1 Pitch perception is adapted to species-specific cochlear filtering

2

3 Kerry MM Walker<sup>1\*</sup>, Ray Gonzalez<sup>2</sup>, Joe Kang<sup>1</sup>, Josh H McDermott<sup>2,3¶</sup> & Andrew J

4 King<sup>1¶</sup>

5 <sup>¶</sup>Joint senior authorship

6 \*Corresponding author (kerry.walker@dpag.ox.ac.uk)

7

8 <sup>1</sup> Department of Physiology, Anatomy & Genetics, University of Oxford

9 <sup>2</sup> Department of Brain and Cognitive Sciences, Massachusetts Institute of Technology

10 <sup>3</sup> Program in Speech and Hearing Biosciences and Technology, Harvard University

11

12

13

14

15

16 Keywords: pitch, ferret, human, psychophysics, auditory nerve, cochlea, resolved

17 harmonics, hearing

18

19 **Abstract**

20 Pitch perception is critical for recognizing speech, music and animal vocalizations,  
21 but its neurobiological basis remains unsettled, in part because of divergent results  
22 from different species. We used a combination of behavioural measurements and  
23 cochlear modelling to investigate whether species-specific differences exist in the  
24 cues used to perceive pitch and whether these can be accounted for by differences in  
25 the auditory periphery. Ferrets performed a pitch discrimination task well whenever  
26 temporal envelope cues were robust, but not when resolved harmonics only were  
27 available. By contrast, human listeners exhibited the opposite pattern of results on an  
28 analogous task, consistent with previous studies. Simulated cochlear responses in the  
29 two species suggest that the relative salience of the two types of pitch cues can be  
30 attributed to differences in cochlear filter bandwidths. Cross-species variation in pitch  
31 perception may therefore reflect the constraints of estimating a sound's fundamental  
32 frequency given species-specific cochlear tuning.

33

34

## 35 **Introduction**

36 Many of the sounds in our environment are periodic, and the rate at which such  
37 sounds repeat is known as their fundamental frequency, or F0. We perceive the F0 of  
38 a sound as its pitch, and this tonal quality is one of the most important features of our  
39 listening experience. The way that F0 changes encodes meaning in speech [1] and  
40 musical melody [2–4]. The F0 of a person’s voice provides a cue to their identity [5–  
41 7] and helps us attend to them in a noisy environment [8–10].

42 The vocal calls of non-human animals are also often periodic, and pitch is  
43 believed to help them to identify individuals and interpret communication calls  
44 [11,12]. Many mammalian species have been shown to discriminate the F0 of  
45 periodic sounds in experimental settings [13–17], and these animal models hold  
46 promise for understanding the neural mechanisms that underlie pitch perception.  
47 However, pitch acuity can differ markedly across species [16,18], raising the  
48 possibility that humans and other mammals may use different neural mechanisms to  
49 extract pitch.

50 The auditory cortex plays a key role in pitch processing, but it remains unclear  
51 how cortical neurons carry out the necessary computations to extract the F0 of a  
52 sound [19]. Neural correlates of F0 cues [20–22] and pitch judgments [23] have been  
53 observed across auditory cortical fields in some species, while a specialized pitch  
54 centre has been described in marmoset auditory cortex [24]. There is similar a lack of  
55 consensus regarding the neural code for pitch in the human brain [25]. A better  
56 understanding of the similarities and differences in pitch processing across species is  
57 essential for interpreting neurophysiological results in animals and relating them to  
58 human pitch perception.

59 Pitch discrimination in humans is driven by two acoustical cues that result  
60 from low-numbered ‘resolved’ harmonics and high-numbered ‘unresolved’ harmonics  
61 [26], and the relative importance of these cues offers a means to compare pitch  
62 mechanisms across species.. In the frequency domain, F0 can be determined from the  
63 distribution of harmonics (Fig. 1A, upper panel) [27–29]. In the auditory nerve, the  
64 frequency spectrum is represented as a “place code” of activation across the tonotopic  
65 map as well as a “time code” of spikes that are phase-locked to the basilar membrane  
66 vibrations [30,31]. However, both these representations are limited by the cochlea’s  
67 frequency resolution [27]. Because cochlear filter bandwidths increase with  
68 frequency, only low-numbered harmonics produce discernible peaks of excitation and  
69 phase locked spikes at their centre frequency (Fig. 1A, middle panel). Such harmonics  
70 are said to be “resolved”. By contrast, high-numbered harmonics are not individually  
71 resolved, and instead produce beating in time at the F0, conveyed by phase-locking to  
72 their envelope [32] (Fig. 1A, bottom panel). For convenience and to be consistent with  
73 prior literature, we refer to these unresolved pitch cues as “temporal” cues, cognizant  
74 that the representation of resolved harmonics may also derive from a temporal neural  
75 code.

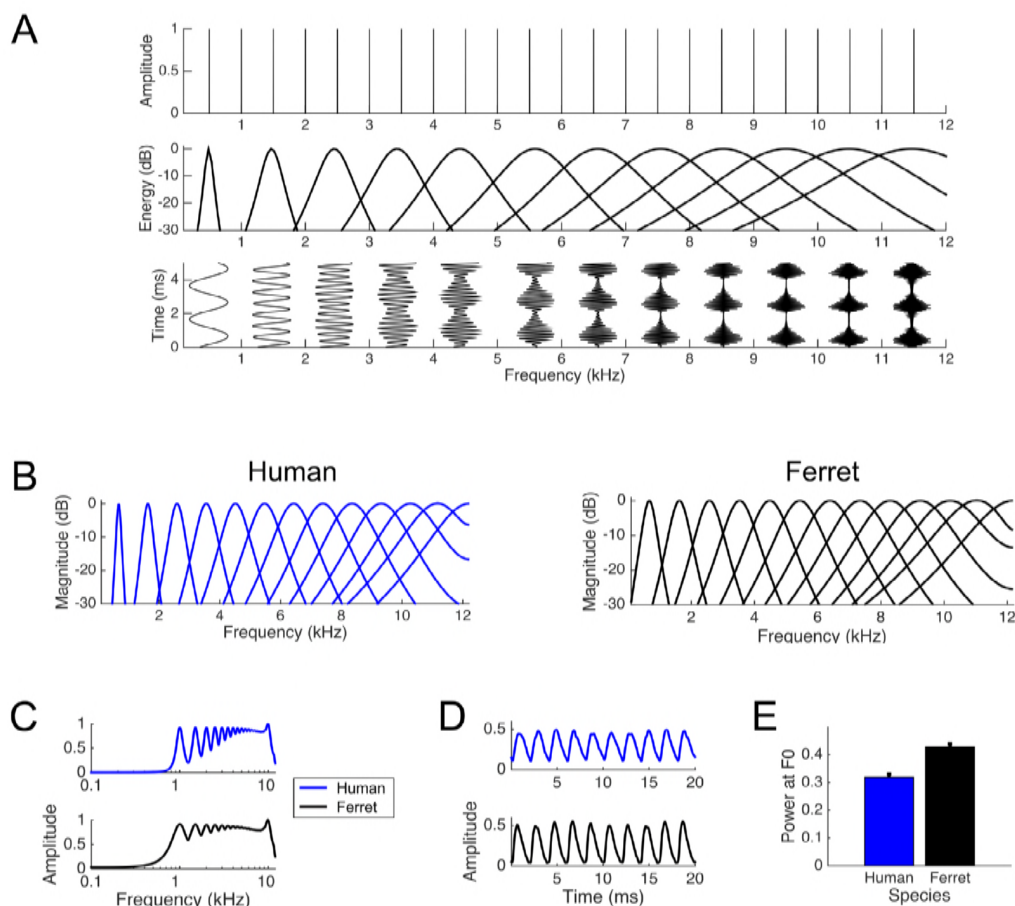

**Figure 1:** Simulated cochlear filters and their responses to a 500 Hz harmonic complex tone. **A.** Illustration of the role of unresolved and resolved harmonics in periodicity encoding. Upper plot: Amplitude spectrum for a tone complex that contains all harmonics of 500 Hz from 0 – 11.5 kHz. This sound will evoke a pitch corresponding to 500 Hz. Middle plot: Cartoon of the cochlear filters centred on every second harmonic of 500 Hz, based on data from Glasberg and Moore [41]. This illustrates that lower harmonics are resolved, while the cochlear filters corresponding to higher order harmonics respond to multiple harmonic components in the tone. Lower plot: The output of each of these cochlear filter is plotted throughout 5 ms of the tone complex. The resolved harmonics phase lock to the frequency of one harmonic, while unresolved harmonics beat at the sum of multiple harmonic components (i.e. 500 Hz), providing an explicit temporal representation of F0. **B-E:** A computational model of the cochlear filter bank was used to simulate representations of complex sounds in the ferret and human auditory nerve. Data are color-coded for the ferret (black) and human (blue). **B.** The frequency tuning of 15 example auditory nerve fibres is shown for the simulated human (left) and ferret (right) cochleae. **C-E.** Analyses of the responses of human and ferret cochlear filter banks to a 500 Hz tone complex. **C.** The response strengths of each of 500 auditory nerve fibres to a 500-Hz complex tone were averaged across the duration of the sound, and plotted across the full range of centre frequencies. Most harmonics produce clearly resolvable activation peaks across fibres in the human cochlea (upper plot), but only the lower harmonics are resolved in the ferret cochlea (lower plot). **D.** The temporal profile of the output of one simulated auditory nerve fibre with a centre frequency of 5000 Hz is shown for the human (upper plot) and ferret (lower plot) cochleae. **E.** The power at 500 Hz in the output of each frequency filter, averaged across the full duration of the tone complex, calculated for the human (blue) and ferret (black) auditory nerve. For each species, these values were normalized by the maximal F0 power across all channels. The plot shows the mean (+ standard error) normalized power at F0 across all auditory nerve fibres.

76

77

78           Although psychophysical experiments have demonstrated that humans can  
79 extract F0 using either resolved harmonics or unresolved harmonics alone [33–35],  
80 pitch perception is generally dominated by resolved harmonics [34,36]. Marmosets  
81 can also use resolved harmonics to detect F0 changes [37], whereas rodents (i.e.  
82 gerbils and chinchillas) rely upon temporal periodicity cues [38–40]. Why resolved  
83 harmonics are more important in humans is unknown, but this could relate to the  
84 availability of pitch cues following cochlear filtering. The growing evidence that  
85 cochlear bandwidths are broader in many other species [41–43] raises the possibility  
86 that they might process pitch cues in different ways from humans.

87           The behavioural studies carried out to date are difficult to compare across  
88 species. First, pitch in humans is defined as the percept through which sounds are  
89 ordered on a scale from low to high [44]. By contrast, animal studies often measure  
90 change detection in a go/no-go task, from which it is difficult to determine whether  
91 they experience a comparable ordered pitch percept or whether they are responding to  
92 a change in the perceived pitch as opposed to some aspect of timbre. A two-  
93 alternative forced choice (2AFC) task requiring “low” and “high” judgements  
94 analogous to those used in human psychophysical tasks would better enable cross-  
95 species comparisons [16], but has yet to be employed to examine the use of resolved  
96 and unresolved cues in animals. Second, the spectral range of stimuli was not fully  
97 controlled across F0 in previous studies (e.g. [16,37]), making it possible for animals  
98 to base their behavioural choices on the lower spectral edge of the sounds, rather than  
99 the sound’s overall F0. Finally, most animal studies [17,37,40] have not directly  
100 compared performance across human and non-human species on an equivalent task,  
101 so differences in task demands might therefore account for any apparent species

102 differences. For example, the pitch difference thresholds of ferrets can differ by  
103 orders of magnitude between a go/no-go and 2AFC task [45].

104 The present study overcomes these limitations by directly comparing the pitch  
105 cues used by humans and ferrets on a common 2AFC pitch classification task. We  
106 first use a computational model to simulate the representation of periodic sounds in  
107 the inner ear. The simulations generated predictions about the availability of  
108 periodicity cues in the auditory nerve of each species. We then tested these  
109 predictions by training ferrets and humans to classify the pitch of a harmonic complex  
110 tone,. We find differences in their dependence on resolved and unresolved harmonics,  
111 which can be accounted by differences in cochlear tuning between ferrets and  
112 humans.

113

## 114 **Results**

### 115 *Simulating the filtering of tones in the ferret and human cochlea*

116 Humans are believed to have narrower cochlear filter bandwidths than ferrets and  
117 other non-human animals [17,41–43,46–49], and these physiological constraints may  
118 predispose them to rely on different acoustical cues to classify the pitch of complex  
119 tones. Specifically, individual auditory nerve fibres are believed to respond to a  
120 narrower range of frequency in humans than in ferrets, which should result in more  
121 resolvable harmonics across the human tonotopic map. On the other hand, if the  
122 bandwidth of an auditory nerve fibre is broader, its firing should phase lock more  
123 strongly to the beating that results from adjacent harmonics, potentially providing a  
124 stronger explicit representation of the temporal periodicity of F0 in ferrets than in  
125 humans.

126 To investigate this hypothesis, we modified a standard model of the cochlear  
127 filter bank [50] to simulate the representation of tones along the human and ferret  
128 basilar membrane. The output of each cochlear filter was half-wave rectified,  
129 compressed (by raising the rectified output to the 0.7 power), and lowpass filtered at  
130 3kHz to simulate the transformation of basilar membrane motion into spiking output  
131 in the auditory nerve. The existing literature guided the design of this model [50–52]  
132 and parameters in the model were derived from either human psychophysics [41] or  
133 ferret auditory nerve recordings [48].

134 As shown in Figure 1B, the cochlear filters are wider for the ferret auditory  
135 nerve than the human. In Figure 1C-E, we compare the human and ferret simulated  
136 responses to a 500-Hz missing F0 tone complex that we used as a training sound in  
137 our ferret behavioural experiment (described below).

138 When the instantaneous power of the cochlear filters is summed across the  
139 duration of the sound and plotted as a function of centre frequency, the individual  
140 harmonics of the tone are more clearly resolved in the human cochlea than in the  
141 ferret (Fig. 1C). This takes the form of deeper troughs in the activation of nerve fibres  
142 whose centre frequencies lie between the harmonic components of the sound. To  
143 visualize the temporal representation of the same stimulus, we plotted the output of a  
144 single nerve fibre (here, a fibre with a centre frequency of 5 kHz) throughout time  
145 (Fig. 1D). In this case, the representation of the 500 Hz F0 is clearer in the ferret – the  
146 human cochlea produces weaker temporal modulation because fewer harmonics fall  
147 within the fibre’s bandwidth.

148 We also examined whether the temporal representation of F0 was enhanced in  
149 the ferret cochlea across the full range of frequency filters. A Fourier transform was  
150 performed on the output of each fibre throughout a 200ms steady-state portion of the



151 sound. The power of the response at F0 was then expressed as a proportion of the  
152 overall power for that fibre. The results of this metric averaged across all fibres in the  
153 model are shown in Fig. 1E. The average temporal representation of F0 was enhanced  
154 in the ferret compared to the human (Wilcoxon rank sum test;  $z = 8.286$ ,  $p = 1.175 \times$   
155  $10^{-16}$ ). In fact, this F0 representation metric was higher in the ferret than the human  
156 cochlear model across every pair of individually simulated auditory nerve fibres.

157 These simulations suggest that the ferret cochlea provides an enhanced  
158 representation of the envelope periodicity of a complex tone, as conveyed by spikes  
159 that are phase-locked to the F0 in the auditory nerve. On the other hand, the human  
160 auditory nerve provides a better resolved representation of individual harmonics  
161 across the tonotopic array. It might thus be expected that these two types of cues  
162 would be utilized to different extents by the two species.

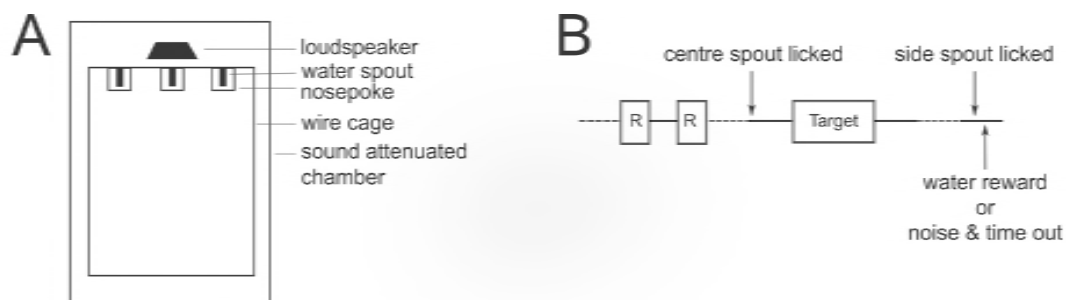

163 **Figure 2:** Psychophysical task design. **A.** Schematic of ferret testing apparatus, viewed from above. **B.**  
164 Schematic of one trial in the 2-alternative forced choice pitch classification task. The target tone could be  
165 lower or higher in F0 than the reference tone (R). Dotted lines indicate time durations that are variable,  
166 depending on the animal's behaviour.

164

### 165 *Behavioural measures of pitch cue use in ferrets*

166 To test the role of different pitch cues in ferret pitch perception, we trained five  
167 animals on a two-alternative forced choice (2AFC) task that requires “low” and  
168 “high” pitch judgements analogous to those used in human psychophysical tasks (Fig.  
169 2A,B). On each trial, a harmonic complex tone was presented at one of two possible  
170 fundamental frequencies. Ferrets were given water rewards for responding at the right

171 nose-poke port for a high F0, and at the left port for a low F0. Incorrect responses  
172 resulted in a time-out. We began by training four ferrets to classify harmonic complex  
173 tones with an F0 of 500 and 1000Hz, with a repeating pure tone presented at 707Hz  
174 (the midpoint on a logarithmic scale) for reference before each trial. Two of these  
175 animals, along with one naïve ferret, were then trained on the same task using target  
176 F0 values of 150 and 450Hz and a 260Hz pure tone reference. In both cases, the  
177 harmonics of the low and high stimuli to be discriminated were matched in spectral  
178 bandwidth, so that ferrets could not solve the task based on the frequency range of the  
179 sound (Fig. 3; left column). Rather, the animals had to discriminate sounds based on  
180 some cue to the F0. After completing several pre-training stages to habituate the  
181 animals to the apparatus and sound presentation (see Methods), the ferrets learned to  
182 perform the pitch classification task within  $22 \pm 3$  (mean  $\pm$  standard deviation) days  
183 of twice daily training.

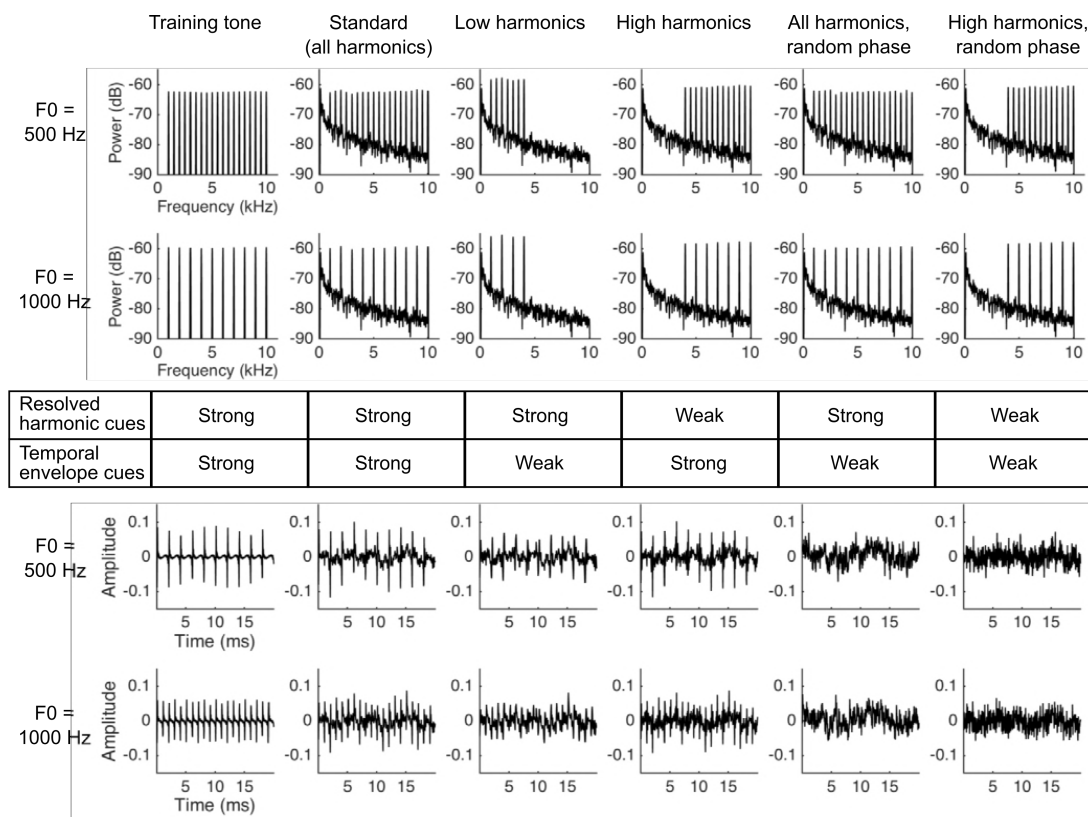

**Figure 3:** Stimuli used in the 707 Hz reference pitch classification task. Plots show the training tone (left column), standard stimulus (second column) and 4 probe stimuli (columns 3-6) used in the psychophysical task. Target stimuli either had an F0 of 500 or 1000 Hz, indicated to the left of each row of plots. The top two rows show the power spectra of each target sound, while the bottom 2 rows plot the temporal envelope of the sound throughout 20 ms. The table in the middle of the figure indicates whether resolved harmonic (above) and temporal envelope (below) F0 cues are preserved in each stimulus.

184

185           Once the ferrets learned to perform this simple 2AFC task, we incorporated  
 186 “probe trials” into the task in order to determine which acoustical cues they were  
 187 using to categorize the trained target sounds. Probe trials made up 20% of trials in a  
 188 given session, and were randomly interleaved with the “standard” trials described  
 189 above. On probe trials, an untrained stimulus was presented, and the ferret received a  
 190 water reward regardless of its behavioural choice. This task design discouraged ferrets  
 191 from learning to use a different strategy to classify the probe sounds.

192           The inner ear is known to produce distortion in response to harmonic tones  
 193 that can introduce energy at the fundamental frequency to the basilar membrane  
 194 response, even for missing-fundamental sounds [53]. These distortion products could  
 195 in principle counter our attempts to match the spectral bandwidths of the sounds,

196 since they could cause the lowest frequency present in the ear to differ as a function  
197 of F0. To determine if the ferrets relied on such cochlear distortion products to  
198 classify tones in our task, we added pink noise to the stimulus on 20% of randomly  
199 interleaved probe trials at an intensity that is known to be more than sufficient to  
200 mask cochlear distortion products in humans [54,55]. Ferrets performed more poorly  
201 on probe trials than on standard trials (paired t-test;  $t = 4.346$ ,  $p = 0.005$ ), as expected  
202 for an auditory discrimination task performed in noise. However, they continued to  
203 perform the pitch classification at  $71.85\% \pm 9.60\%$  correct (mean  $\pm$  standard  
204 deviation) with the noise masker, which is well above chance (1-sample t-test;  $t =$   
205  $6.025$ ,  $p = 0.001$ ). This suggests that ferrets did not rely on cochlear distortion  
206 products to solve our task.

207 We next moved to the main testing stage of our behavioural experiment,  
208 which aimed to determine if ferrets use resolved harmonics, temporal envelope  
209 periodicity, or both of these cues to identify the F0 of tones. All tone complexes, both  
210 the standard and probe stimuli, were superimposed on a pink noise masker. Our  
211 auditory nerve model (above) allowed us to estimate which harmonics in the tone  
212 complexes would be resolved in the ferret auditory nerve (Fig. 4A) [56]. This analysis  
213 suggests that our standard tones contained both resolved and unresolved harmonics  
214 for ferret listeners, as intended. We constructed four types of probe stimuli based on  
215 our resolvability estimates: (1) “Low Harmonic” tones containing only harmonics that  
216 we expected to be resolved; (2) “High Harmonic” tones containing harmonics  
217 presumed to be less well resolved; (3) “All Harmonics Random Phase” probes  
218 containing the full set of harmonics present in the standard tone, but whose phases  
219 were independently randomized in order to flatten the temporal envelope; and (4)  
220 “High Harmonics Random Phase” stimuli with the same randomization of harmonic

221 phases, but containing only presumptively unresolved harmonics. The spectral ranges  
 222 of these stimuli are given in Figure 4B, and the spectra and audio waveforms  
 223 (showing the temporal envelope periodicity) of the 500 and 1000 Hz stimuli are  
 224 illustrated in Figure 3A. Ferrets were again given water rewards irrespective of their  
 225 behavioural choice on probe trials, in order to avoid reinforcing different pitch  
 226 classification strategies across probe stimuli.

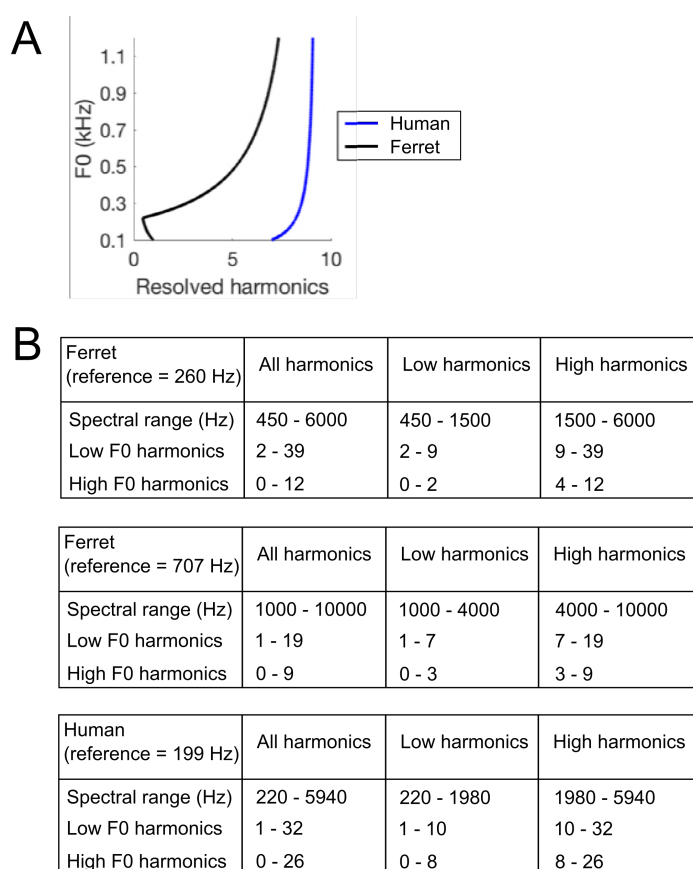

**Figure 4:** Harmonic content of stimuli. **A.** The number of resolved harmonics was estimated over a range of F0s, for ferret (black line) and human (blue line) cochlea. **B.** The frequency ranges and numbers of harmonic partials included in each stimulus. In this table, the F0 is deemed to be “0”, and further harmonics are counted from 1 onwards.

227

228 The performance of ferrets on the standard and probe stimuli is shown in  
 229 Figure 5A. A repeated-measures 3-way ANOVA indicated that performance varied  
 230 with stimulus type (i.e., the standard and 4 probe stimuli) ( $F = 10.540$ ,  $p = 0.003$ ), but  
 231 not across subjects ( $F = 1.060$ ;  $p = 0.391$ ) or the two reference conditions (i.e., 260  
 232 and 707 Hz) ( $F = 0.438$ ,  $p = 0.576$ ). Scores did not significantly vary across  
 233 individual ferrets in either the 260 Hz (2-way ANOVA;  $F = 0.366$ ,  $p = 0.704$ ) or 707

234 Hz condition (2-way ANOVA;  $F = 2.063$ ,  $p = 0.158$ ), so data collected from the same  
 235 animals in these two conditions were treated as independent measurements.

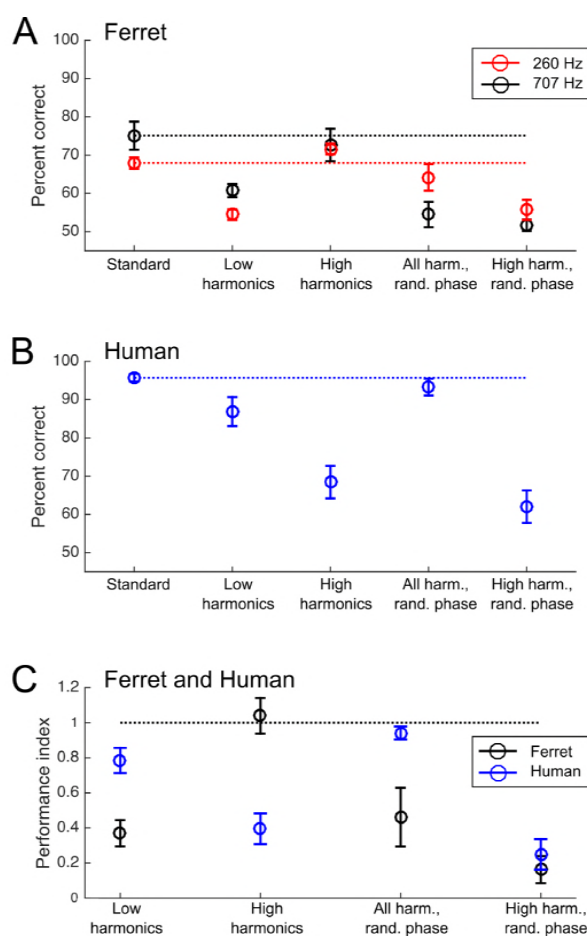

**Figure 5:** Pitch classification performance of ferrets and humans. **A.** Ferrets' percent correct scores on the pitch classification task are plotted for the standard tone trials (left) and each of 4 probe stimuli (right). The results of testing with the 260 Hz reference (150 and 450 Hz targets; red) and 707 Hz reference (500 and 1000 Hz targets; black) are plotted separately. **B.** Humans' pitch classification performance is plotted, as in (A). **C.** Performance for each of 4 probe stimuli is expressed as the ratio of the percentage correct score and that achieved with the standard training tone stimulus. Data are shown for ferrets (black) and humans (blue). Values of 0 indicate that subjects performed at chance for the probe stimulus, while 1 indicates that they classified the F0 of the probe as accurately as the training stimulus. Error bars show mean  $\pm$  SEM. Individual data for (A) and (B) are shown in Supp Figure 1.

236

237 To assess the acoustical cues used by animals to solve the pitch classification  
 238 task, we compared ferrets' performance on the standard trials with that on each of the  
 239 four probe trial types (repeated measures 2-way ANOVA, Tukey's HSD test). Ferrets  
 240 showed impaired performance on probes that contained only low harmonics ( $p =$   
 241  $0.001$ ), but performed as well as on standard trials when only high harmonics were  
 242 presented ( $p = 1.000$ ). Their performance was also impaired when we randomized the  
 243 phases of the high-harmonics ( $p = 0.002$ ). Phase randomization also impaired  
 244 performance when the full set of harmonics (both resolved and unresolved) were  
 245 present ( $p = 2.173 \times 10^{-5}$ ). This pattern of results suggests that ferrets rely more  
 246 strongly on the temporal envelope periodicity (produced by unresolved harmonics)

247 than on resolved harmonics to classify the pitch of tones, unlike what would be  
248 expected for human listeners.

249

### 250 *Comparison of human and ferret pitch classification performance*

251 Humans were trained on a similar pitch classification task to the one described for  
252 ferrets in order to best compare the use of pitch cues between these two species.

253 Participants were presented with harmonic complex tones and classified them as high  
254 or low. A training phase was used to teach participants the high and low F0s.

255         We tested human listeners using the same types of standard and probe stimuli  
256 as in the final stage of ferret testing described above. As the pitch discrimination  
257 thresholds of human listeners are known to be superior to those of ferrets [16], we  
258 adapted the target F0s (180 and 220 Hz) and harmonic cut-offs for human hearing  
259 (Fig. 4). The between-species comparison of interest here is therefore not the  
260 difference in absolute scores on the task, but the pattern of performance across probe  
261 conditions.

262         Human listeners also showed varied pitch classification performance across  
263 the standard and probe stimuli (repeated-measures 2-way ANOVA;  $F = 36.999$ ,  $p =$   
264  $1.443 \times 10^{-15}$ ). However, a different pattern of performance across stimuli was  
265 observed for human subjects (Fig. 5B). Tukey's HSD tests indicated that human  
266 listeners were significantly impaired when resolved harmonics were removed from  
267 the sounds, as demonstrated by impairments in the "High Harmonic" probes with ( $p =$   
268  $9.922 \times 10^{-9}$ ) and without ( $p = 1.029 \times 10^{-8}$ ) randomized phases. Conversely, no  
269 impairment was observed when resolved harmonics were available, regardless of  
270 whether the phases of stimuli were randomized ("All Harmonics Random Phase"  
271 condition;  $p = 0.959$ ) or not ("Low Harmonics" condition;  $p = 0.101$ ). These results

272 are all consistent with the wealth of prior work on human pitch perception, but  
273 replicate previously reported effects in a task analogous to that used in ferrets.

274 The performance for each probe type relative to performance on the standard  
275 stimuli, is directly compared between the two species in Figure 5C. Here, a score of 1  
276 indicates that the subject performed equally well for the standard tone and the probe  
277 condition, while a score of 0 indicates that the probe condition fully impaired their  
278 performance (reducing it to chance levels). This comparison illustrates the differences  
279 in acoustical cues underlying ferret and human pitch classifications. As our model  
280 simulations predicted, we found that while ferrets were impaired only when temporal  
281 envelope cues from unresolved harmonics were disrupted, humans continued to  
282 classify the target pitch well in the absence of temporal envelope cues, so long as  
283 resolved harmonics were present. This was confirmed statistically as a significant  
284 interaction between species and probe type on performance (repeated measures 3-way  
285 ANOVA;  $F = 14.802$ ,  $p = 3.412 \times 10^{-9}$ ). The two species thus appear to  
286 predominantly rely on distinct cues to pitch.

287

## 288 **Discussion**

289 We used a combination of cochlear modelling and behavioural experiments to  
290 examine the use of pitch cues in ferrets and human listeners. Our model simulations  
291 illustrated how broader cochlear filter widths in ferrets result in fewer resolved  
292 harmonics and a more enhanced representation of temporal envelopes than the human  
293 cochlea. Based on this result, we predicted that the pitch judgments of ferrets would  
294 rely more strongly on temporal envelope cues than that of human listeners. Our  
295 behavioural experiments directly compared the use of pitch cues in the two species  
296 and found that this is indeed the case. Our results provide the first unambiguous



297 dissociation of pitch mechanisms across species, by utilizing the same task across  
298 species, and provide an illustration of the potential consequences of species  
299 differences in cochlear tuning.

300

### 301 *Findings in other species*

302 Human listeners have consistently been found to have better pitch discrimination  
303 thresholds when stimuli contain resolved harmonics [34–36,57,58]. Moreover,  
304 cortical responses to pitched sound in humans are stronger for resolved than  
305 unresolved harmonics, mirroring perceptual sensitivity [59,60]. The results of our  
306 human experiments are thus fully consistent with this large body of prior work, while  
307 enabling comparison with non-human animals. Because most natural sounds contain  
308 both low- and high-numbered harmonics, humans may learn to derive pitch primarily  
309 from resolved harmonics even when temporal envelope cues are also available, and  
310 are thus less equipped to derive pitch from unresolved harmonics alone. This would  
311 explain the drop in performance when resolved harmonic cues were removed on  
312 probe trials in our experiment.

313 Our cochlear simulations suggest that harmonic resolvability is worse for ferrets  
314 than human listeners, so they may conversely learn to rely more on temporal pitch  
315 cues when estimating pitch from natural sounds, leading to poorer performance for  
316 low harmonic tone complexes. Many non-human mammals are believed to have  
317 wider cochlear bandwidths than humans [42,43,61,62], and so we might expect  
318 temporal cues to dominate their pitch decisions as we have observed in ferrets. The  
319 few studies to directly address F0 cue use in pitch judgments by non-human animals  
320 have raised the possibility of species differences in pitch perception, but have relied  
321 on go/no-go tasks that differ from standard psychophysical tasks used in humans. For

322 instance, studies in gerbils suggest that they primarily use temporal cues to detect an  
323 inharmonic component in a tone complex [38,39]. Chinchillas were similarly shown  
324 to detect the onset of a periodic sound following a non-periodic sound using temporal,  
325 rather than resolved harmonic, cues [40,63]. While these studies did not explicitly  
326 compare the use of resolved and unresolved pitch cues, they are consistent with our  
327 findings regarding the importance of temporal cues in non-human species.

328 Marmosets, on the other hand, appear to use the phase of harmonic components to  
329 detect changes in the F0 of a repeating tone complex only when resolved harmonics  
330 are omitted from the stimulus [17,37]. This suggests that temporal cues are only  
331 salient for this species when they occur in unresolved harmonics. Similarly to  
332 humans, marmosets were found to detect smaller changes in F0 when harmonics were  
333 resolved than when only unresolved harmonics were available [37]. Comparable  
334 studies have yet to be carried out in other non-human primates, so it remains unclear  
335 whether primates are special in the animal kingdom in their dependence on resolved  
336 harmonic cues. We note also that the behavioural task used in previous marmoset  
337 experiments [17,37] required animals to detect a change in F0, whereas the task  
338 employed in this study required ferrets to label the direction of F0 changes. Ferrets  
339 show an order of magnitude difference in pitch acuity on these two tasks [45], raising  
340 the possibility that primates might as well.

341 The use of probe trials without feedback in the present experiment allowed us to  
342 determine which acoustical cues most strongly influenced listeners' pitch judgements.  
343 The ferrets relied predominantly on temporal cues under these conditions, but our  
344 results do not preclude the possibility that they could also make pitch judgments  
345 based on resolved harmonics if trained to do so. Indeed, although human listeners rely  
346 on resolved harmonics under normal listening conditions, we can also extract pitch

347 from unresolved harmonics when they are isolated [34,36,57]. Our simulations show  
348 that up to 8 harmonics are resolved on the ferret cochlea, depending on the F0 (Fig.  
349 4A). Consequently, if specifically trained to do so, one might expect ferrets to be able  
350 to derive F0 from these harmonics using the same template matching mechanism  
351 proposed for human listeners [27,29]. It is also important to note that the relationship  
352 between harmonic resolvability and auditory nerve tuning is not fully understood, and  
353 nonlinearities in response to multiple frequency components could cause resolvability  
354 to be worse than that inferred from isolated auditory nerve fibre measurements.

355 Overall, the available evidence fits with the idea that pitch judgments are adapted  
356 to the acoustical cues that are available and robust in a particular species, with  
357 differences in cochlear tuning thus producing cross-species diversity in pitch  
358 perception. A similar principle may be at work in human hearing, since listeners rely  
359 on harmonicity for some pitch tasks and spectral changes in others, potentially  
360 because of task-dependent differences in the utility of particular cues [7]. The  
361 application of normative models of pitch perception will likely provide further insight  
362 into the relative importance of these cues.

363

#### 364 *Implications for neurophysiological work*

365 A better understanding of the similarities and differences in pitch processing  
366 across species is essential for relating the results of neurophysiological studies in  
367 animals to human pitch perception. The present experiments suggest that ferrets, a  
368 common animal model in studies of hearing (e.g. [23,64–67]), can estimate F0 from  
369 the temporal envelopes of harmonic complex tones. Our data indicate that ferrets  
370 generalize across sounds with different spectral properties (including wideband  
371 sounds, sounds in noise, and sounds containing only high harmonics) without relying

372 on explicit energy at the F0. In this respect, ferrets appear to have a pitch percept,  
373 even though the cues underlying it are apparently weighted differently than in human  
374 pitch perception.

375 The existing literature might be taken to suggest that primates are the most  
376 appropriate animal models for examining the role of resolved harmonics in human  
377 pitch perception, as they appear to be more like humans in their use of this cue  
378 [17,37]. On the other hand, our data suggest that ferrets are a powerful animal model  
379 for evaluating temporal models of pitch extraction (e.g. [50,68]). Like the ferret,  
380 cochlear implant users also have poor spectral resolution at the cochlea, and  
381 consequently these devices are severely limited in their ability to represent resolved  
382 harmonics. Using species such as the ferret to better understand the neural basis of  
383 temporal pitch processing could provide insight into why current implants produce  
384 impoverished pitch perception [69], and how they might be improved in the future.

385

## 386 **Materials and Methods**

### 387 **EXPERIMENTAL SUBJECTS**

#### 388 *Ferrets (Mustela putorius furo)*

389 Five adult female pigmented ferrets (aged 6 – 24 months) were trained in this study.  
390 Power calculations estimated that 5 animals was the minimum appropriate sample  
391 size for 1-tailed paired comparisons with alpha = 5%, a medium (0.5) effect size, and  
392 beta = 20%. Ferrets were housed in groups of 2-3, with free access to food pellets.  
393 Training typically occurred in runs of 5 consecutive days, followed by two days rest.  
394 Ferrets could drink water freely from bottles in their home boxes on rest days. On  
395 training days, drinking water was received as positive reinforcement on the task, and  
396 was supplemented as wet food in the evening to ensure that each ferret received at

397 least 60 ml/kg of water daily. Regular otoscopic and tympanometry examinations were  
398 carried out to ensure that the animals' ears were clean and healthy, and veterinary  
399 checks upon arrival and yearly thereafter confirmed that animals were healthy. The  
400 animal procedures were approved by the University of Oxford Committee on Animal  
401 Care and Ethical Review and were carried out under license from the UK Home  
402 Office, in accordance with the Animals (Scientific Procedures) Act 1986.

#### 403 *Humans*

404 The pitch classification performance of 16 adult humans (9 male, ages 18-53 years;  
405 mean age = 25.3 years) was also examined, which provided a 60% beta in the power  
406 calculations described for ferrets. All subjects reported having normal hearing. All  
407 experimental procedures on humans were approved by the Committee on the Use of  
408 Humans as Experimental Subjects at MIT.

409

#### 410 METHOD DETAILS

##### 411 *Cochlear filter simulations*

412 We used a cochlear filter bank previously developed by Patterson et al. [50] and  
413 implemented by Slaney [70] to simulate representations of sounds on the basilar  
414 membrane. The model simulates the response of the basilar membrane to complex  
415 sounds through two processing modules: (a) a set of parallel Gammatone filters, each  
416 with a different characteristic frequency and Equivalent Rectangular Bandwidth  
417 (ERB), produces a simulation of basilar membrane motion in response to the sound,  
418 and (b) a two-dimensional adaptation mechanism as observed in hair cell physiology.  
419 In order to compare the representation of harmonic tone complexes in the human and  
420 ferret cochlea, we modified this model to use filter constants derived from either  
421 psychophysical estimates of human cochlear filters [41], or ferret auditory nerve

422 recordings [48]. Based on these sources, the equivalent rectangular bandwidth of filter  
423  $i$  in the human cochlea was calculated as:

$$424 \text{ERB}_i = f_i / (12.7 * (f_i/1000)^{0.3}),$$

425 where  $f_i$  is the centre frequency of the filter in Hz.

426 For the ferret cochlea, the equivalent rectangular bandwidth of each filter was  
427 estimated using the following linear fit to the data in Sumner and Palmer [48]:

$$428 \text{ERB}_i = f_i / 8.9047 + 209.6149.$$

429 The output of each channel in the above Gammatone filter bank was half-wave  
430 rectified and then compressed (to the power of 0.7) to simulate transduction of sound  
431 by inner hair cells. Finally, the output was low-pass filtered at 3kHz to reflect the  
432 spike rate limit of auditory nerve fibres. This model architecture is similar to that used  
433 in previous studies (e.g. [51,52]).

#### 434 *Training apparatus*

435 Ferrets were trained to discriminate sounds in custom-built testing chambers,  
436 constructed from a wire mesh cage (44 x 56 x 49 cm) with a solid plastic floor, placed  
437 inside a sound-insulated box lined with acoustic foam to attenuate echoes. Three  
438 plastic nose poke tubes containing an inner water spout were mounted along one wall  
439 of the cage: a central “start spout” and two “response spouts” to the left and right (Fig.  
440 2A). Ferrets’ nose pokes were detected by breaking an infrared LED beam across the  
441 opening of the tube, and water was delivered from the spouts using solenoids. Sound  
442 stimuli, including acoustic feedback signals, were presented via a loudspeaker (FRS  
443 8; Visaton, Crewe, UK) mounted above the central spout, which had a flat response  
444 ( $\pm 2$  dB) from 0.2 – 20 kHz. The behavioural task, data acquisition, and stimulus  
445 generation were all automated using a laptop computer running custom Matlab (The

446 Mathworks, Natick, MA, USA) code, and a real-time processor (RP2; Tucker-Davis  
447 Technologies, Alachua, FL, USA).

#### 448 *Pre-training*

449 Ferrets ran two training sessions daily, and typically completed  $94 \pm 24$  trials per  
450 session (mean  $\pm$  standard deviation). Several pre-training stages were carried out to  
451 shape animals' behaviour for our classification task. In the first session, animals  
452 received a water reward whenever they nose poked at any of the spouts. Next, they  
453 received water rewards only when they alternated between the central and peripheral  
454 spouts. The water reward presented from the peripheral response spouts (0.3 - 0.5 ml  
455 per trial) was larger than that presented at the central start spout (0.1 - 0.2 ml per  
456 trial). The animal was required to remain in the central nose poke for 300 ms to  
457 receive a water reward from that spout.

458         Once animals performed this task efficiently, sound stimuli were introduced in  
459 the next session. At the start of each trial, a repeating pure tone "reference" (200 ms  
460 duration, 200 ms inter-tone interval, 60 dB SPL) was presented to indicate that the  
461 central spout could be activated. Nose poking at the central spout resulted in the  
462 presentation of a repeating complex tone "target" (200 ms duration, 200 ms inter-tone  
463 interval, 70 dB SPL) after a 100 ms delay. The animal was again required to remain at  
464 the centre for 300 ms, and early releases now resulted in the presentation of an "error"  
465 broadband noise burst (200 ms duration, and 60 dB SPL) and a 3 s timeout before a  
466 new trial began. The target tone could take one of two possible F0 values, which  
467 corresponded to rewards at one of the two peripheral spouts (right rewards for high F0  
468 targets, and left for low F0s). For all training and testing stages, the target tones  
469 contained harmonics within the same frequency range, so that animals could not use  
470 spectral cut-offs to classify the sounds. The target tone continued to play until the

471 animal responded at the correct peripheral spout, resulting in a water reward. Once the  
472 animals could perform this final pretraining task with >70% accuracy across trials,  
473 they advanced to pitch classification testing.

#### 474 *Testing stages and stimuli*

475 The complex tone target was presented only once per trial, and incorrect peripheral  
476 spout choices resulted in an error noise and a 10 s timeout (Fig. 2B). After such an  
477 error, the following trial was an error correction trial, in which the F0 presented was  
478 the same as that of the previous trial. These trials were included to discourage ferrets  
479 from always responding at the same peripheral spout. If the ferret failed to respond at  
480 either peripheral spout for 14 s after target presentation, the trial was restarted.

481 The reference pure tone's frequency was set to halfway between the low and  
482 high target F0s on a log scale. We examined ferrets' pitch classification performance  
483 using two pairs of complex tone targets in separate experimental blocks: the first with  
484 F0s of 500 and 1000 Hz (707 Hz reference), and the second with 150 and 450 Hz  
485 targets (260 Hz reference). Four ferrets were trained on the 707 Hz reference. Two of  
486 these animals, plus an additional naive animal, were trained on the 260 Hz reference.  
487 In each case, testing took place over 3 stages, in which the ferret's task remained the  
488 same but a unique set of stimulus parameters was changed (Fig. 3 and 4), as outlined  
489 below. Ferrets were allocated to the 260 and 707 Hz reference conditions based on  
490 their availability at the time of testing.

491 *Stage 1:* Target sounds were tone complexes, containing all harmonics within  
492 a broad frequency range (specified in Fig. 4B). When an animal performed this task  
493 >75% correct on 3 consecutive sessions, ( $32.8 \pm 7.1$  sessions from the beginning of  
494 training; mean  $\pm$  standard deviation;  $n = 4$  ferrets), they moved to Stage 2.



495           *Stage 2:* On 80% of trials, the same standard target tones from Stage 1 were  
496 presented. The other 20% of trials were “probe trials”, in which the ferret was  
497 rewarded irrespective of the peripheral spout it chose, without a timeout or error  
498 correction trial. Probe trials were randomly interleaved with standard trials. The probe  
499 stimuli differed only by the addition of pink noise (0.1-10 kHz) to the target sounds,  
500 in order to mask possible cochlear distortion products at F0. The level of the noise  
501 masker was set so that the power at the output of a Gammatone filter centred at the F0  
502 (with bandwidth matched to ferret auditory nerve measurements in that range [48])  
503 was 5dB below the level of the pure tone components of the target. This is  
504 conservative because distortion products are expected to be at least 15 dB below the  
505 level of the stimulus components [54,55]. When an animal performed this task >75%  
506 correct on 3 consecutive sessions, they moved to stage 3.

507           *Stage 3:* The probe stimulus from Stage 2 served as the “Standard” sound on  
508 80% of trials, and all stimuli (both the standard and probes) included the pink noise  
509 masker described above. Twenty percent of trials were probe trials, as in Stage 2, but  
510 this stage contained tones manipulated to vary the available pitch cues. We estimated  
511 the resolvability of individual harmonics using ERB measurements available in  
512 previously published auditory nerve recordings [48]. For a given F0, the number of  
513 resolved harmonics was approximated as the ratio of F0 and the bandwidth of  
514 auditory nerve fibres with a characteristic frequency at that F0, as described by Moore  
515 and Ohgushi [56], and applied by Osmanski et al. [17]. This measure yielded between  
516 1 and 8 resolved harmonics for ferrets, depending on the F0 (Fig. 4A). Four types of  
517 probe stimuli were presented: (1) “Low Harmonics”, which contained only harmonics  
518 presumed to be resolved; (2) “High Harmonics”, comprised of harmonics presumed to  
519 be unresolved; (3) “All Harmonics Random Phase”, which contained the same set of

520 harmonics as the standard, but whose phases were independently randomized in order  
521 to reduce temporal envelope cues for pitch; and (4) “High Harmonics Random  
522 Phase”, which contained the harmonics present in “High Harmonics” stimuli, but with  
523 randomized phases. The bandpass cutoffs for the probe stimuli were chosen so that  
524 the “Low Harmonic”, but not “High Harmonic”, probes contained resolved harmonics  
525 for ferret listeners. Each probe stimulus was presented on at least 40 trials for each  
526 ferret, while the standard was tested on over 1000 trials per ferret.

### 527 *Human psychophysical task*

528 Human subjects were tested on a pitch classification task that was designed to be as  
529 similar as possible to Stage 3 of ferrets’ task (see above). Target F0s of 180 and 220  
530 Hz were tested on 16 subjects.

531 In the psychophysical task, human listeners were presented with the same  
532 classes of stimuli described above for ferrets. The frequency ranges included in the  
533 probe stimuli are listed in Fig. 4B. Sounds were presented over headphones  
534 (Sennheiser HD280) in a sound attenuated booth (Industrial Acoustics, USA). A  
535 repeating reference pure tone (200 ms duration, 200 ms inter-tone interval, 60 dB  
536 SPL) was presented at the start of a trial, and the subject initiated the target harmonic  
537 tone complex (200 ms duration, 70 dB SPL) presentation with a keypress. Text on a  
538 computer monitor then asked the subject whether the sound heard was the low or high  
539 pitch, which the subjects answered via another keypress (1 = low, 0 = high). Feedback  
540 was given on the monitor after each trial to indicate whether or not the subject had  
541 responded correctly. Incorrect responses to the standard stimuli resulted in  
542 presentation of a broadband noise burst (200 ms duration, and 60 dB SPL) and a 3 s  
543 timeout before the start of the next trial. Error correction trials were not used for  
544 human subjects, as they did not have strong response biases. Standard harmonic

545 complex tones were presented on 80% of trials, and the 4 probes (“Low Harmonics”,  
546 “High Harmonics”, “All Harmonics Random Phase”, and “High Harmonics Random  
547 Phase”) were presented on 20% of randomly interleaved trials. Feedback for probe  
548 trials was always “correct”, irrespective of listeners’ responses. Humans were given  
549 10 practice trials with the standard stimuli before testing, so that they could learn  
550 which stimuli were low and high, and how to respond with the keyboard. Each probe  
551 stimulus was tested on 40 trials for each subject, while the standard was tested on 680  
552 trials per subject.

553

## 554 QUANTIFICATION AND STATISTICAL ANALYSIS

### 555 *Psychophysical data analysis*

556 Error correction trials were excluded from all data analysis, as were data from any  
557 testing session in which the subject scored less than 60% correct on standard trials. T-  
558 tests and ANOVAs with an alpha of 5% were used throughout to assess statistical  
559 significance, where the n indicates the number of subjects per group. Error bars in  
560 Figures 1 and 5 show mean  $\pm$  standard errors. Further details of all statistical tests  
561 described here are provided as supplementary tables.

562 Because humans produced higher percent correct scores overall than ferrets on  
563 the behavioural task, we normalized probe scores against the standard scores when  
564 directly comparing performance between species. The score of each species in each  
565 probe condition was represented as:

$$566 P_{norm_{ai}} = (P_{ai} - 50) / (S_a - 50),$$

567 where  $P_{norm}$  is the normalized probe score for species  $a$  on probe  $i$ ,  $P_{ai}$  is the percent  
568 correct score for species  $a$  on probe  $i$ , and  $S_a$  is the percent correct score of species  $a$   
569 on the standard trials. If the performance of species  $a$  is unimpaired for a given probe

570 stimulus  $i$  relative to the standard stimulus, then  $Pnorm_{ai}$  will equal 1. If the listeners  
571 are completely unable to discriminate the F0 of the probe, then  $Pnorm_{ai} = 0$ .

572           The data and custom software developed in this manuscript are available on  
573 the Dryad archive.

574

575

576 **Acknowledgments**

577 This work was supported by a BBSRC New Investigator Award (BB/M010929/1) and  
578 a DPAG Early Career Fellowship (University of Oxford) to KMMW, a McDonnell  
579 Scholar Award to JHM, and a Wellcome Principal Research Fellowship to AJK  
580 (WT076508AIA, WT108369/Z/2015/Z), which included an Enhancement Award for  
581 JHM.

582

583

584 **Declaration of Interests**

585 The authors and funding bodies have no competing financial interests in the outcomes  
586 of this research.

587 **References**

- 588 1. Ohala, J.J. (1983). Cross-Language Use of Pitch: An Ethological View.  
589 *Phonetica* 40, 1–18.
- 590 2. Dowling, W.J., and Fujitani, D.S. (1971). Contour, interval, and pitch  
591 recognition in memory for melodies. *J Acoust Soc Am* 49, 524.
- 592 3. Krumhansl, C.L. (1990). *Cognitive Foundations of Musical Pitch* (New York:  
593 Oxford University Press).
- 594 4. Cousineau, M., Demany, L., and Pressnitzer, D. (2009). What makes a  
595 melody: The perceptual singularity of pitch sequences. *J Acoust Soc Am*  
596 126, 3179–3187.
- 597 5. Gelfer, M.P., and Mikos, V.A. (2005). The relative contributions of speaking  
598 fundamental frequency and formant frequencies to gender identification  
599 based on isolated vowels. *J Voice* 19, 544–554.
- 600 6. Latinus, M., and Belin, P. (2011). Human voice perception. *Curr Biol* 21,  
601 R143–R145.
- 602 7. McPherson, M.J., and McDermott, J.H. (2018). Diversity in pitch perception  
603 revealed by task dependence. *Nat Hum. Beh* 2, 1–15.
- 604 8. Darwin, C.J. (2005). Pitch and Auditory Grouping. In *Pitch: Neural Coding  
605 and Perception*, C. J. Plack, R. R. Fay, A. J. Oxenham, and A. N. Popper, eds.  
606 (New York: Springer-Verlag), pp. 278–305.
- 607 9. Miller, S.E., Schlauch, R.S., and Watson, P.J. (2010). The effects of  
608 fundamental frequency contour manipulations on speech intelligibility in  
609 background noise. *J Acoust Soc Am* 128, 435–443.
- 610 10. Popham, S., Boebinger, D., Ellis, D.P.W., Kawahara, H., and McDermott, J.H.  
611 (2018). Inharmonic speech reveals the role of harmonicity in the cocktail

- 612 party problem. *Nat Comm* 9, 2122.
- 613 11. Nelson, D.A. (1989). Song frequency as a cue for recognition of species and  
614 individuals in the field sparrow (*Spizella pusilla*). *J Comp Psychol* 103,  
615 171–176.
- 616 12. Koda, H., and Masataka, N. (2002). A pattern of common acoustic  
617 modification by human mothers to gain attention of a child and by  
618 macaques of others in their group. *Psychol Rep* 91, 421–422.
- 619 13. Heffner, H., and Whitfield, I.C. (1976). Perception of the missing  
620 fundamental by cats. *J Acoust Soc Am* 59, 915–919.
- 621 14. Tomlinson, R.W., and Schwarz, D.W. (1988). Perception of the missing  
622 fundamental in nonhuman primates. *J Acoust Soc Am* 84, 560–565.
- 623 15. Shofner, W.P., Yost, W.A., and Whitmer, W.M. (2007). Pitch perception in  
624 chinchillas (*Chinchilla laniger*): Stimulus generalization using rippled  
625 noise. *J Comp Psychol* 121, 428–439.
- 626 16. Walker, K.M.M., Schnupp, J.W.H., Hart-Schnupp, S.M.B., King, A.J., and  
627 Bizley, J.K. (2009). Pitch discrimination by ferrets for simple and complex  
628 sounds. *J Acoust Soc Am* 126, 1321–1335.
- 629 17. Osmanski, M.S., Song, X., and Wang, X. (2013). The role of harmonic  
630 resolvability in pitch perception in a vocal nonhuman primate, the  
631 common marmoset (*Callithrix jacchus*). *J Neurosci* 33, 9161–9168.
- 632 18. Shofner, W.P. (2005). Comparative Aspects of Pitch Perception. In *Pitch:  
633 Neural Coding and Perception Springer Handbook of Auditory Research*, C.  
634 J. Plack, A. J. Oxenham, R. R. Fay, and A. N. Popper, eds. (New York:  
635 Springer Science+Business Media, Inc.), pp. 56–98.
- 636 19. Wang, X., and Walker, K.M.M. (2012). Neural mechanisms for the

- 637 abstraction and use of pitch information in auditory cortex. *J Neurosci* 32,  
638 13339–13342.
- 639 20. Bizley, J.K.K., Walker, K.M.M.M., Silverman, B.W.W., King, A.J.J., and  
640 Schnupp, J.W.H.W. (2009). Interdependent encoding of pitch, timbre, and  
641 spatial location in auditory cortex. *J Neurosci* 29, 2064–2075.
- 642 21. Bendor, D., and Wang, X. (2010). Neural coding of periodicity in marmoset  
643 auditory cortex. *J Neurophysiol* 103, 1809–1822.
- 644 22. Fishman, Y.I., Micheyl, C., and Steinschneider, M. (2013). Neural  
645 representation of harmonic complex tones in primary auditory cortex of  
646 the awake monkey. *J Neurosci* 33, 10312–10323.
- 647 23. Bizley, J.K., Walker, K.M.M., Nodal, F.R., King, A.J., and Schnupp, J.W.H.  
648 (2013). Auditory cortex represents both pitch judgments and the  
649 corresponding acoustic cues. *Curr Biol* 23, 620–625.
- 650 24. Bendor, D., and Wang, X. (2005). The neuronal representation of pitch in  
651 primate auditory cortex. *Nature* 436, 1161–1165.
- 652 25. Griffiths, T.D., and Hall, D.A. (2012). Mapping pitch representation in  
653 neural ensembles with fMRI. *J Neurosci* 32, 13343–13347.
- 654 26. Moore, B.C.J., and Gockel, H.E. (2011). Resolvability of components in  
655 complex tones and implications for theories of pitch perception. *Hear Res*  
656 276, 88–97.
- 657 27. Goldstein, J.L. (1974). An optimum processor theory for the central  
658 formation of the pitch of complex tones. *J Acoust Soc Am* 55, 1061–1069.
- 659 28. Terhardt, E. (1974). Pitch, consonance, and harmony. *J Acoust Soc Am* 55,  
660 1061–1069.
- 661 29. Shamma, S., and Klein, D. (2000). The case of the missing pitch templates:



- 662           how harmonic templates emerge in the early auditory system. *J Acoust Soc*  
663           *Am* 107, 2631–2644.
- 664   30.   Cariani, P.A., and Delgutte, B. (1996). Neural correlates of the pitch of  
665           complex tones. I. Pitch and pitch salience. *J Neurophysiol* 76, 1698–1716.
- 666   31.   Schnupp, J.W.H., Nelken, I., and King, A.J. (2011). *Auditory neuroscience :  
667           making sense of sound* (MIT Press).
- 668   32.   Schouten, J.F. (1970). The residue revisited. In *Frequency Analysis and  
669           Periodicity Detection in Hearing*, R. Plomp and G. F. Smoorenburg, eds.  
670           (Leiden: Sijthoff), pp. 41–58.
- 671   33.   Houtsma, A.J.M., and Smurzynski, J. (1990). Pitch identification and  
672           discrimination for complex tones with many harmonics. *J Acoust Soc Am*  
673           87, 304–310.
- 674   34.   Shackleton, T.M., and Carlyon, R.P. (1994). The role of resolved and  
675           unresolved harmonics in pitch perception and frequency modulation  
676           discrimination. *J Acoust Soc Am* 95, 3529–3540.
- 677   35.   Bernstein, J.G., and Oxenham, A.J. (2003). Pitch discrimination of diotic and  
678           dichotic tone complexes: harmonic resolvability or harmonic number? *J  
679           Acoust Soc Am* 113, 3323–33234.
- 680   36.   Ritsma, R.J. (1967). Frequencies dominant in the perception of the pitch of  
681           complex sounds. *J Acoust Soc Am* 42, 191–198.
- 682   37.   Song, X., Osmanski, M.S., Guo, Y., and Wang, X. (2016). Complex pitch  
683           perception mechanisms are shared by humans and a New World monkey.  
684           *Proc Natl Acad Sci U S A* 113, 781–786.
- 685   38.   Klinge, A., and Klump, G.M. (2009). Frequency difference limens of pure  
686           tones and harmonics within complex stimuli in Mongolian gerbils and

- 687 humans. *J Acoust Soc Am* 125, 304–314.
- 688 39. Klinge, A., and Klump, G.M. (2010). Mistuning detection and onset  
689 asynchrony in harmonic complexes in Mongolian gerbils. *J Acoust Soc Am*  
690 128, 280–290.
- 691 40. Shofner, W.P., and Chaney, M. (2013). Processing pitch in a nonhuman  
692 mammal (*Chinchilla laniger*). *J Comp Psychol* 127, 142–153.
- 693 41. Glasberg, B.R., and Moore, B.C.J. (1990). Derivation of auditory filter  
694 shapes from notched-noise data. *Hear Res* 47, 103–138.
- 695 42. Shera, C.A., Guinan, J.J., and Oxenham, A.J. (2002). Revised estimates of  
696 human cochlear tuning from otoacoustic and behavioral measurements.  
697 *Proc Natl Acad Sci U S A* 99, 3318–3323.
- 698 43. Joris, P.X., Bergevin, C., Kalluri, R., Mc Laughlin, M., Michelet, P., van der  
699 Heijden, M., and Shera, C.A. (2011). Frequency selectivity in Old-World  
700 monkeys corroborates sharp cochlear tuning in humans. *Proc Natl Acad*  
701 *Sci U S A* 108, 17516–17520.
- 702 44. Anon (1994). American National Standard Acoustical Terminology  
703 (American National Standards Inst.).
- 704 45. Walker, K.M.M., Bizley, J.K., King, A.J., and Schnupp, J.W.H. (2011). Cortical  
705 encoding of pitch: Recent results and open questions. *Hear Res* 271, 74–87.
- 706 46. Pickles, J.O., and Comis, S.D. (1976). Auditory-nerve-fiber bandwidths and  
707 critical bandwidths in the cat. *J Acoust Soc Am* 60, 1151–1156.
- 708 47. Kittel, M., Wagner, E., and Klump, G.M. (2002). An estimate of the auditory-  
709 filter bandwidth in the Mongolian gerbil. *Hear Res* 164, 69–76.
- 710 48. Sumner, C.J., and Palmer, A.R. (2012). Auditory nerve fibre responses in  
711 the ferret. *Eur J Neurosci* 36, 2428–2439.

- 712 49. Alves-pinto, A., Sollini, J., Wells, T., Sumnerqjf, C.J., Alves-pinto, A., Sollini, J.,  
713 Wells, T., and Sumner, C.J. (2016). Behavioural estimates of auditory filter  
714 widths in ferrets using notched-noise maskers. *J Acoust Soc Am* 139, EL19.
- 715 50. Patterson, R., Robinson, K., Holdworth, J., McKeown, D., Zhang, C., and  
716 Allerhand, M. (1992). Complex sounds and auditory images. In *Auditory*  
717 *Physiology and Perception*, Y. Cazals, K. Horner, and L. Demany, eds.  
718 (Elsevier Ltd), pp. 429–446.
- 719 51. Karajalainen, M. (1996). A binaural auditory model for sound quality  
720 measurements and spatial hearing studies. In *IEEE International*  
721 *Conference on Acoustics, Speech, and Signal Processing (Atlanta, GA, USA:*  
722 *IEEE)*, pp. 985–988.
- 723 52. Roman, N., Wang, D., and Brown, G.J. (2003). Speech segregation based on  
724 sound localization. *J Acoust Soc Am* 114, 2236–2252.
- 725 53. Robles, L., Ruggero, M.A., and Rich, N.C. (1991). Two-tone distortion in the  
726 basilar membrane of the cochlea. *Nature* 349, 413–414.
- 727 54. Pressnitzer, D., and Patterson, R.D. (2001). Distortion products and the  
728 perceived pitch of harmonic complex tones. In *Physiological and*  
729 *Psychophysical Bases of Auditory Function*, D. Breebaart, A. Houtsma, A.  
730 Kohlrausch, V. Prijs, and R. Schoonhoven, eds. (Maastricht: Shaker BV), pp.  
731 97–104.
- 732 55. Norman-Haignere, S., and McDermott, J.H. (2016). Distortion products in  
733 auditory fMRI research: Measurements and solutions. *Neuroimage* 129,  
734 401–413.
- 735 56. Moore, B.C.J., and Ohgushi, K. (1993). Audibility of partials in inharmonic  
736 complex tones. *J Acoust Soc Am* 93, 452–461.

- 737 57. Moore, B.C.J., Peters, R.W., and Glasberg, B.R. (1985). Thresholds for the  
738 detection of inharmonicity in complex tones. *J Acoust Soc Am* 77, 1861–  
739 1867.
- 740 58. Kaernbach, C., and Bering, C. (2001). Exploring the temporal mechanism  
741 involved in the pitch of unresolved harmonics. *J Acoust Soc Am* 110, 1039–  
742 1048.
- 743 59. Penagos, H., Melcher, J.R., and Oxenham, A.J. (2004). A neural  
744 representation of pitch salience in nonprimary human auditory cortex  
745 revealed with functional magnetic resonance imaging. *J Neurosci* 24,  
746 6810–6815.
- 747 60. Norman-Haignere, S., Kanwisher, N., and McDermott, J.H. (2013). Cortical  
748 pitch regions in humans respond primarily to resolved harmonics and are  
749 located in specific tonotopic regions of anterior auditory cortex. *J Neurosci*  
750 33, 19451–19469.
- 751 61. Liberman, M.C. (1978). Auditory-nerve response from cats raised in a low-  
752 noise chamber. *J Acoust Soc Am* 63, 442–455.
- 753 62. Temchin, A.N., Rich, N.C., and Ruggero, M.A. (2008). Threshold tuning  
754 curves of chinchilla auditory-nerve fibers. I. Dependence on characteristic  
755 frequency and relation to the magnitudes of cochlear vibrations. *J*  
756 *Neurophysiol* 100, 2889–2898.
- 757 63. Shofner, W.P. (2002). Perception of the periodicity strength of complex  
758 sounds by the chinchilla. *Hear Res* 173, 69–81.
- 759 64. Fritz, J., Shamma, S., Elhilali, M., and Klein, D. (2003). Rapid task-related  
760 plasticity of spectrotemporal receptive fields in primary auditory cortex.  
761 *Nat Neurosci* 6, 1216–1223.

- 762 65. Walker, K.M.M., Bizley, J.K., King, A.J., and Schnupp, J.W.H. (2011).  
763 Multiplexed and robust representations of sound features in auditory  
764 cortex. *J Neurosci* 31, 14565–14576.
- 765 66. Atilgan, H., Town, S.M., Wood, K.C., Jones, G.P., Maddox, R.K., Lee, A.K.C., and  
766 Bizley, J.K. (2018). Integration of visual information in auditory cortex  
767 promotes auditory scene analysis through multisensory binding. *Neuron*  
768 97, 640–655.
- 769 67. Schwartz, Z.P., and David, S. V (2018). Focal suppression of distractor  
770 sounds by selective attention in auditory cortex. *Cereb Cortex* 28, 323–  
771 339.
- 772 68. Meddis, R., and O’Mard, L. (1997). A unitary model of pitch perception. *J*  
773 *Acoust Soc Am* 102, 1811–1820.
- 774 69. Gfeller, K., Turner, C., Oleson, J., Zhang, X., Gantz, B., Froman, R., and  
775 Olszewski, C. (2007). Accuracy of cochlear implant recipients on pitch  
776 perception, melody recognition, and speech reception in noise. *Ear Hear*  
777 28, 412–423.
- 778 70. Slaney, M. (1993). An efficient implementation of the Patterson-  
779 Holdsworth auditory filter bank.

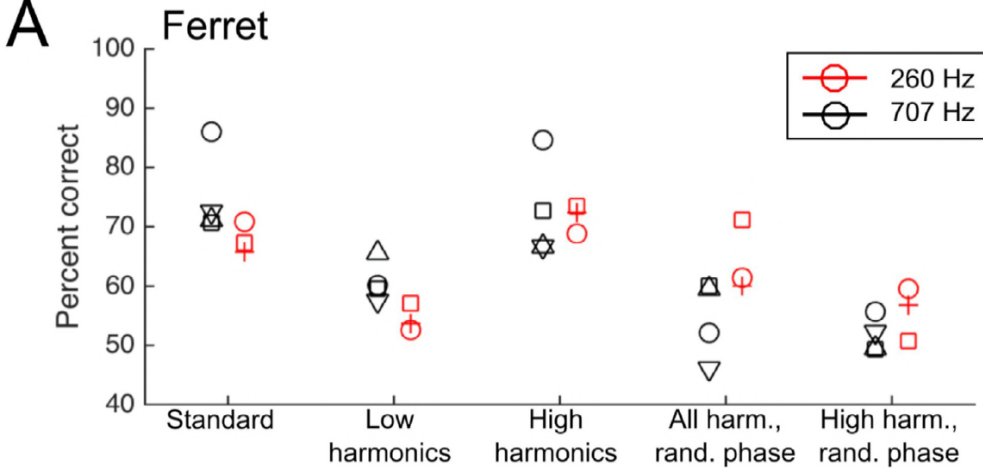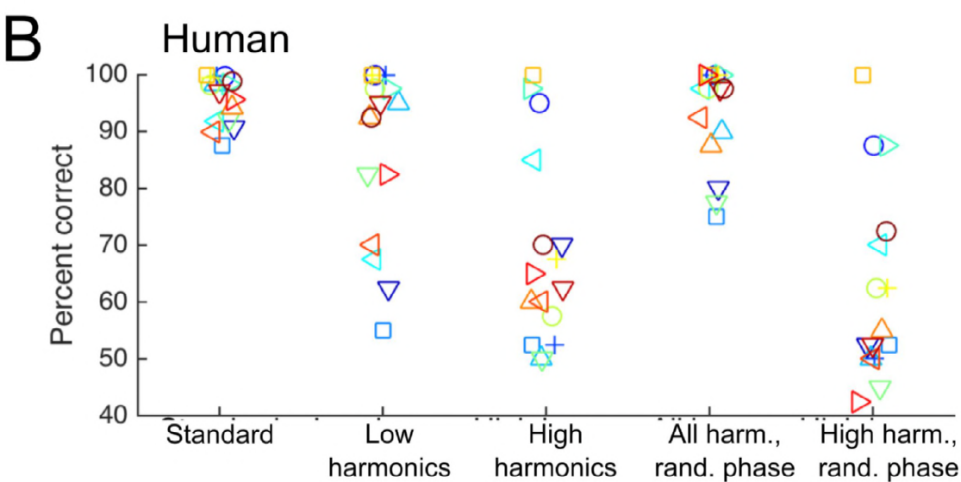

**Supplemental Figure 1:** Pitch classification performance of ferrets and humans, as shown in Figure 5A and B. Here, data are plotted for individual subjects. **A.** Ferrets' percent correct scores on the pitch classification task are plotted for the standard tone trials (left) and each of 4 probe stimuli (right). The results of testing with the 260 Hz reference (150 and 450 Hz targets; red) and 707 Hz reference (500 and 1000 Hz targets; black) are plotted separately. Symbol shapes represent individual ferrets. **B.** Humans' pitch classification performance, as plotted in (A) above. Data are randomly jittered on the x-axis to facilitate visualization of individual points. Each symbol and colour combination indicates an individual subject.

**A**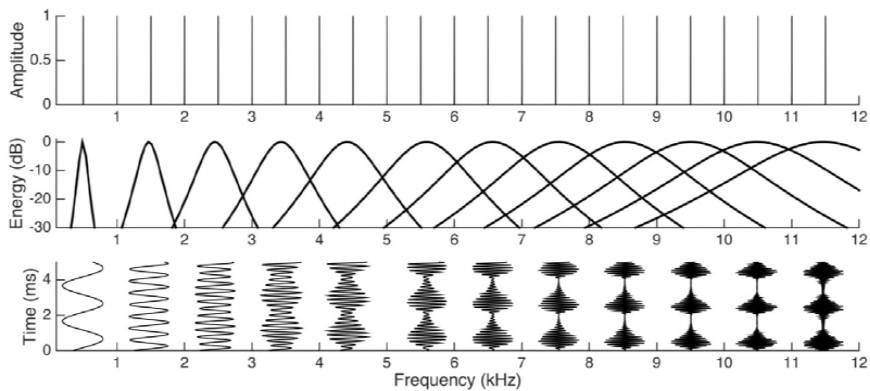**B**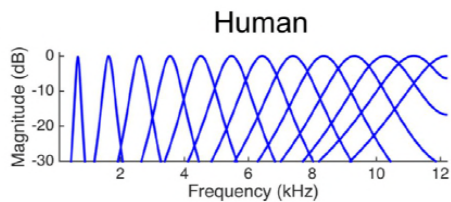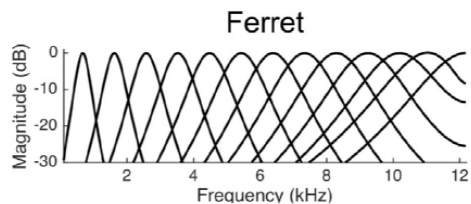**C**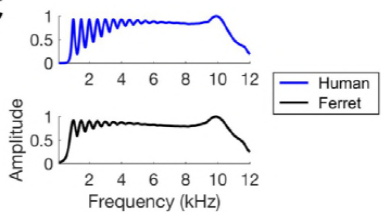**D**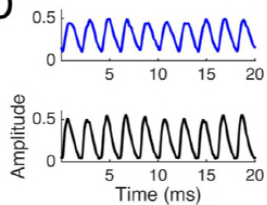**E**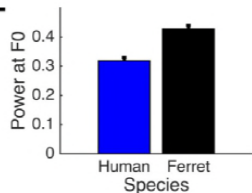

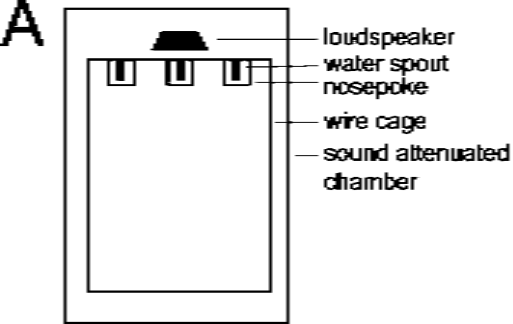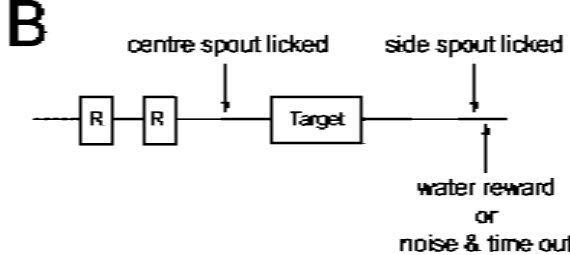



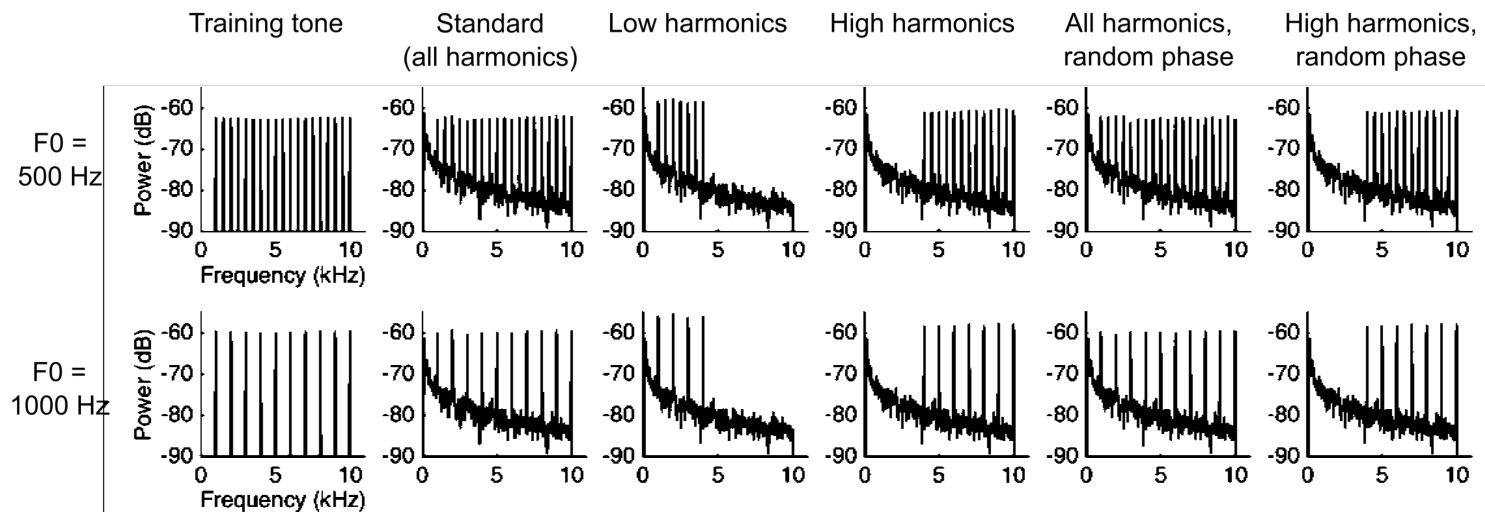

|                        |        |        |        |        |        |      |
|------------------------|--------|--------|--------|--------|--------|------|
| Resolved harmonic cues | Strong | Strong | Strong | Weak   | Strong | Weak |
| Temporal envelope cues | Strong | Strong | Weak   | Strong | Weak   | Weak |

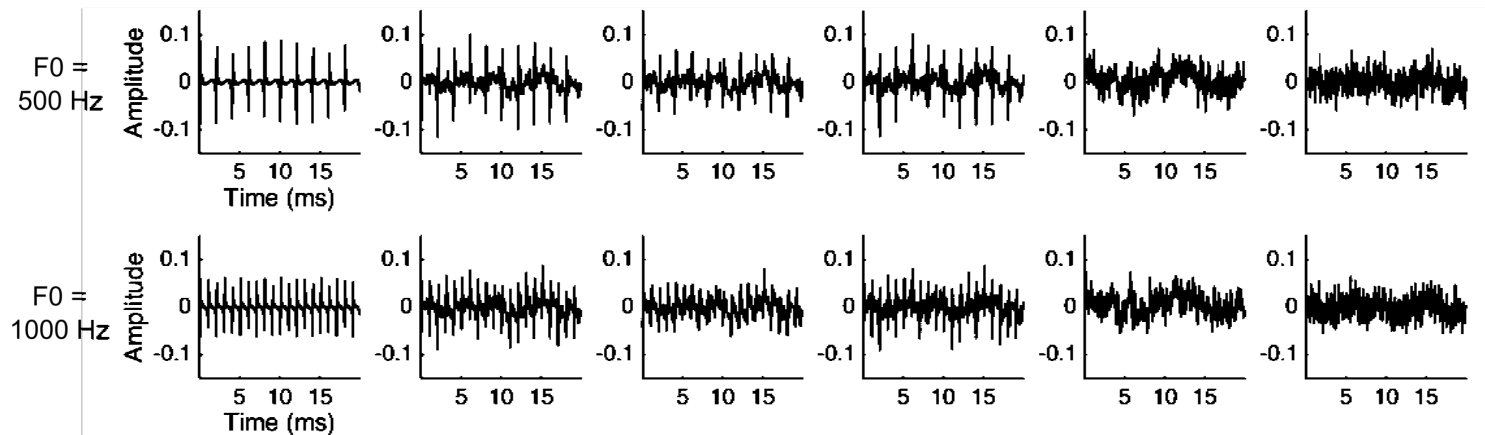

A

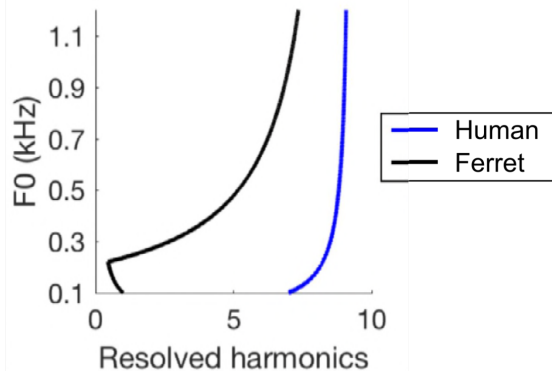

B

| Ferret<br>(reference = 260 Hz) | All harmonics | Low harmonics | High harmonics |
|--------------------------------|---------------|---------------|----------------|
| Spectral range (Hz)            | 450 - 6000    | 450 - 1500    | 1500 - 6000    |
| Low F0 harmonics               | 3 - 40        | 3 - 10        | 10 - 40        |
| High F0 harmonics              | 1 - 13        | 1 - 3         | 5 - 13         |

| Ferret<br>(reference = 707 Hz) | All harmonics | Low harmonics | High harmonics |
|--------------------------------|---------------|---------------|----------------|
| Spectral range (Hz)            | 1000 - 10000  | 1000 - 4000   | 4000 - 10000   |
| Low F0 harmonics               | 2 - 20        | 2 - 8         | 8 - 20         |
| High F0 harmonics              | 1 - 10        | 1 - 4         | 4 - 10         |

| Human<br>(reference = 199 Hz) | All harmonics | Low harmonics | High harmonics |
|-------------------------------|---------------|---------------|----------------|
| Spectral range (Hz)           | 220 - 5940    | 220 - 1980    | 1980 - 5940    |
| Low F0 harmonics              | 2 - 33        | 2 - 11        | 11 - 33        |
| High F0 harmonics             | 1 - 27        | 1 - 9         | 9 - 27         |

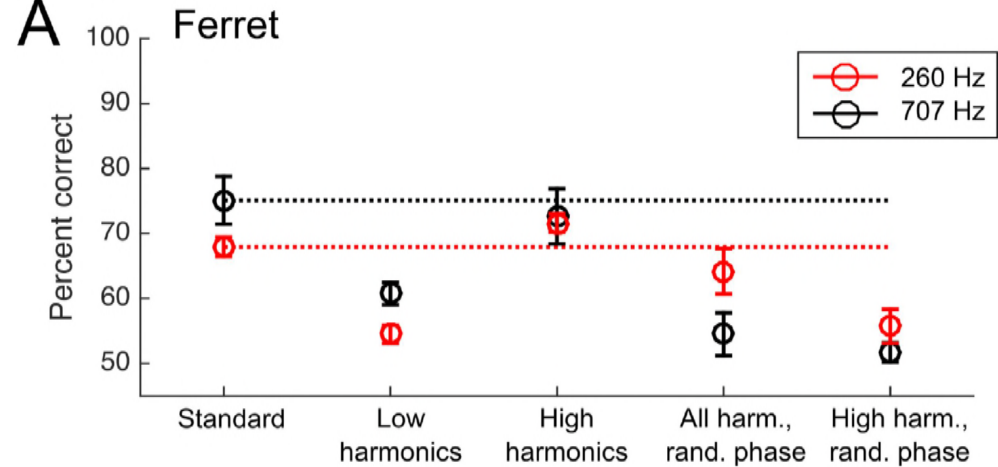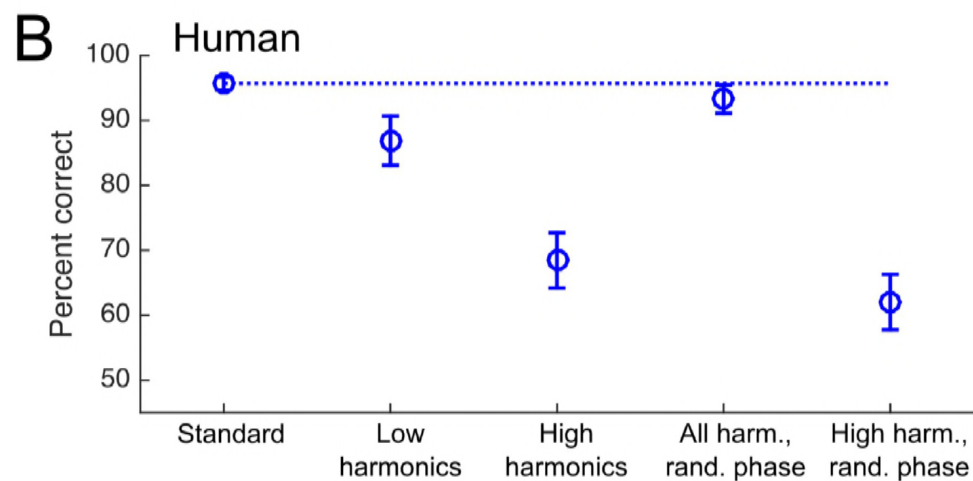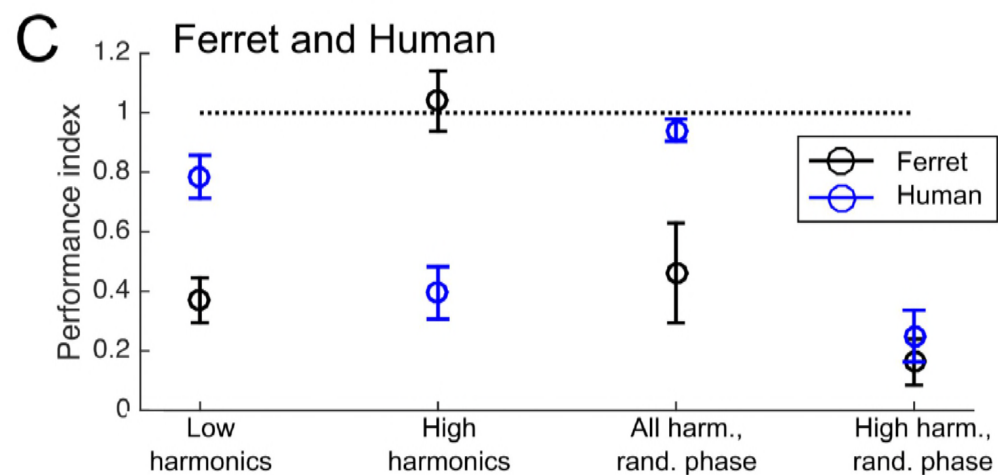

Source: http://biorxiv.org/content/10.1101/420786v1.full.pdf
